# 1 The most developmentally truncated fishes show extensive 2 *Hox* gene loss and miniaturized genomes

3

4 Martin Malmstrøm<sup>1,2,\*</sup>, Ralf Britz<sup>3</sup>, Michael Matschiner<sup>1,2</sup>, Ole K. Tørresen<sup>1</sup>, Renny  
5 K. Hadiaty<sup>4</sup>, Norsham Yaakob<sup>5</sup>, Heok H. Tan<sup>6</sup>, Kjetill S. Jakobsen<sup>1</sup>, Walter  
6 Salzburger<sup>1,2</sup> & Lukas Rüber<sup>7,8,\*</sup>

7

8 <sup>1</sup>Centre for Ecological and Evolutionary Synthesis (CEES), Department of Biosciences, University  
9 of Oslo, Oslo, Norway. <sup>2</sup>Zoological Institute, University of Basel, Basel, Switzerland. <sup>3</sup>Department  
10 of Life Sciences, Natural History Museum, London, UK. <sup>4</sup>Museum Zoologicum Bogoriense,  
11 Research Center for Biology, Indonesian Institute of Sciences, Cibinong, Indonesia. <sup>5</sup>Forest  
12 Research Institute Malaysia, Kuala Lumpur, Malaysia. <sup>6</sup>Lee Kong Chian Natural History Museum,  
13 National University of Singapore, Singapore. <sup>7</sup>Naturhistorisches Museum der Burgergemeinde  
14 Bern, Bern, Switzerland. <sup>8</sup>Institute of Ecology and Evolution, University of Bern, Bern,  
15 Switzerland. \*Corresponding authors Ma.M. and L.R.

16

## 17 **Abstract**

18 *Hox* genes play a fundamental role in regulating the embryonic development of  
19 all animals. Manipulation of these transcription factors in model organisms has  
20 unraveled key aspects of evolution, like the transition from fin to limb. However,  
21 by virtue of their fundamental role and pleiotropic effects, simultaneous  
22 knockouts of several of these genes pose significant challenges. Here, we report  
23 on evolutionary simplification in two species of the dwarf minnow genus  
24 *Paedocypris* using whole genome sequencing. The two species feature  
25 unprecedented *Hox* gene loss and genome reduction in association with their  
26 massive developmental truncation. We also show how other genes involved in  
27 the development of musculature, nervous system, and skeleton have been lost in  
28 *Paedocypris*, mirroring its highly progenetic phenotype. Further, we identify two  
29 mechanisms responsible for genome streamlining: severe intron shortening and  
30 reduced repeat content. As a naturally simplified system closely related to  
31 zebrafish, *Paedocypris* provides novel insights into vertebrate development.

32

33

34

## 35 Introduction

36 The developmental mechanisms that determine how genotypes translate into  
37 phenotypes and how selection acts on genotypes to shape morphological  
38 differences are central to our understanding of the diversity of living  
39 organisms<sup>1,2</sup>. Model organisms have been instrumental in our quest to decipher  
40 how genetic differences are associated with morphological and physiological  
41 disparity<sup>3</sup>, and improved technologies for genetic modifications will aid in  
42 further elucidating genotype-phenotype interrelations<sup>4</sup>. One interesting example  
43 is the recent work by Nakamura *et al.* (2016), which utilized CRISPR-Cas9 to  
44 knock out three *Hox13* copies (*Aa*, *Ab*, and *D*) in zebrafish (*Danio rerio*) to  
45 investigate the role of these genes in the transition from fins to limbs. Although  
46 experiments like these are now feasible, the pleiotropic effects of genes involved  
47 in fundamental developmental processes, such as those of the large *Hox* gene  
48 family, present challenges and limitations to the phenotypic variation that can  
49 easily be induced in model organisms through genetic engineering. Examining  
50 naturally occurring extreme phenotypes in close relatives of model organisms  
51 thus provides a novel source of phenotypic and genotypic variation that is  
52 becoming increasingly important in improving our understanding of the  
53 molecular basis of evolutionary changes<sup>5</sup>.

54 Discovered around 200 years ago<sup>6</sup>, the zebrafish has been used as a  
55 molecular model organism since the 1980s and is currently one of the most  
56 important model systems for studying vertebrate development, genome  
57 evolution, toxicology, physiology, behavior, and disease<sup>7,8</sup>. Comparative efforts  
58 have so far focused on closely related *Danio* species<sup>9,10</sup>, but recent studies have  
59 revealed that the diversity of zebrafish mutants is surpassed by the range of  
60 phenotypic variation among several of its related species in the wild<sup>3,11,12</sup>. Some  
61 of these other members of Cyprinidae (e.g *Paedocypris*, *Sundadanio*, and  
62 *Danionella*) are characterized by developmental truncation<sup>13-16</sup> and  
63 morphological novelties<sup>16-18</sup> and thus offer additional, underappreciated  
64 potential for comparative studies and promise fundamental and transformative  
65 advances in our understanding of the molecular underpinnings of evolutionary  
66 change leading to novelty and adaptation at a genetic and phenotypic level<sup>3</sup>.

67 The Series Otophysi, which includes Cyprinidae, represents one of the

68 earliest diverging teleostean lineages, and the phylogeny of this lineage remains  
69 controversial<sup>13,19-23</sup>. One particularly difficult taxon to place confidently is the  
70 recently discovered miniaturized dwarf minnow genus *Paedocypris*<sup>13,15,21,22,24</sup>  
71 found in the highly acidic blackwater of endangered peat swamp forests in  
72 Southeast Asia. This genus of tiny vertebrates includes the world's smallest fish,  
73 maturing at ~8 mm<sup>25</sup>. *Paedocypris* exhibits an extreme case of organism-wide  
74 progenesis or developmental truncation, resulting in an anatomical adult  
75 condition closely resembling that of a 7.5 mm zebrafish larva, with over 40 bones  
76 not developed<sup>15</sup>. To investigate the genomic signatures of developmental  
77 truncation, we sequenced and compared the genomes of two representatives of  
78 the genus *Paedocypris*; *P. carbunculus* and *P. micromegethes*. The genome  
79 signatures of these two species allow the distinction of genus-specific from  
80 species-specific genomic changes and thus enable identification of features  
81 associated with the extreme phenotype of *Paedocypris*. By comparing their  
82 genomes with those of other teleosts, including the closely related zebrafish, we  
83 identify *Paedocypris*-specific genomic signatures of developmental truncation in  
84 the form of loss of various key developmental genes, mirroring their progenetic  
85 phenotype. We further demonstrate how the *Paedocypris* genome size has been  
86 reduced through shorter genes due to significantly shorter introns compared to  
87 zebrafish, while exon lengths and gene numbers have remained relatively  
88 unchanged. We find that the *Paedocypris* genomes are comparable in size and  
89 gene structure (i.e short introns and compact genomes) to those of the two  
90 pufferfish model organisms; *Takifugu rubripes* and *Dichotomyctere nigroviridis*,  
91 which have the smallest vertebrate genomes known<sup>26</sup>. Additionally, we show  
92 that the accumulation of transposable elements (TEs), especially DNA  
93 transposons, is very low, following the diversification of the genus *Paedocypris*,  
94 and propose a potential mechanism for enhanced transposon-silencing activity  
95 through duplication of the PIWI-like (*PIWI1*) gene in this lineage. Highly  
96 progenetic fish species like *Paedocypris* will be important resources for future  
97 studies on vertebrate development, presenting a novel opportunity to  
98 investigate phenotype–genotype relationships in early vertebrate development  
99 and the genetic mechanisms of developmental truncation.

100

## 101 **Results**

### 102 **Loss of *Hox*- and other developmental genes**

103 *Hox* genes encode transcription factors essential in body patterning along the  
104 anterior-posterior body axis during early development of all animals<sup>27</sup>. Although  
105 a large number of genes is involved in developmental processes, *Hox* genes are  
106 especially interesting as they remain organized in conserved clusters and are  
107 ordered along the chromosomes according to where and when they are  
108 activated<sup>28</sup>.

109 As all known *Paedocypris* species have a progenetic phenotype, we  
110 investigated whether this condition is reflected in their *Hox* gene repertoire. We  
111 compared 70 *Hox* gene transcripts, encoded by the 49 *Hox* genes in zebrafish, to  
112 detect syntenic *Hox* cluster regions in the two *Paedocypris* genomes (Methods  
113 Supplementary Note and Supplementary Table 1). For *Hox* clusters *Aa*, *Ab*, and  
114 *Bb*, we recover all genes on one to three contiguous sequences in synteny with  
115 *Danio rerio* (Figure 1a). Two scaffolds in both *Paedocypris* species cover the  
116 *HoxBa* cluster; however, functional copies of *hoxB10a* and *hoxB7a* cannot be  
117 identified in this region. In total, 10 of the zebrafish *Hox* genes appear to be  
118 absent in *Paedocypris*, and their predicted positions are illustrated as red lines in  
119 Figure 1a. While the remaining *Hox* clusters are recovered as more fragmented,  
120 most of the genetic regions are covered by contiguous sequences containing  
121 intact copies of other *Hox* genes in at least one of the two *Paedocypris* species.  
122 None of the 10 *Hox* genes could be detected in other parts of the genomes by  
123 sequence similarity searches, strengthening the hypothesis that these genes are  
124 indeed lost in this lineage. Although extensive *Hox* gene loss has been reported  
125 for other cyprinids, these are secondary losses, following genome duplication  
126 events<sup>29</sup>. Figure 1b shows the positions of both the missing and the present *Hox*  
127 genes in *Paedocypris* compared to currently available otophysan genomes,  
128 illustrating the most plausible reconstruction of *Hox*-cluster evolution in this fish  
129 lineage.



145 of other key genes involved in various developmental pathways. We first  
 146 determined the overlap in gene space between the two *Paedocypris* species, the  
 147 zebrafish, and the two tetraodontid models *Di. nigroviridis* and *T. rubripes*, as  
 148 these pufferfishes have similarly small genomes as the *Paedocypris* species.  
 149 Figure 2a shows the number of shared orthogroups for all species, identified  
 150 using OrthoFinder<sup>33</sup>, and highlights the number of orthogroups without  
 151 orthologs in *Paedocypris* (numbers in bold). We used the set of genes from these  
 152 1,160 orthogroups to identify a comprehensive list of 1,581 genes that had gene  
 153 ontologies associated with different system development pathways and pattern  
 154 specific processes in *D. rerio* (Methods and Supplementary Table 2). These 1,581  
 155 genes were then used as queries to screen the genomic sequences and annotated  
 156 protein sets of *Paedocypris*. Fourteen of these genes, primarily involved in  
 157 skeletal- (*ucmab*, *disc1* and *lbh*), muscle- (*ccdc78* and *marcksa*), and nervous  
 158 system (*nkx2.9*, *pho*, *cntf*, *thfrsf1b*, *tnfrsf19* and *lepa*) development, were not  
 159 found in either of the *Paedocypris* species (Figure 2b). Adjacent flanking genes in  
 160 zebrafish could, however, be identified in *Paedocypris* for all 14 genes  
 161 (Supplementary Table 3).  
 162

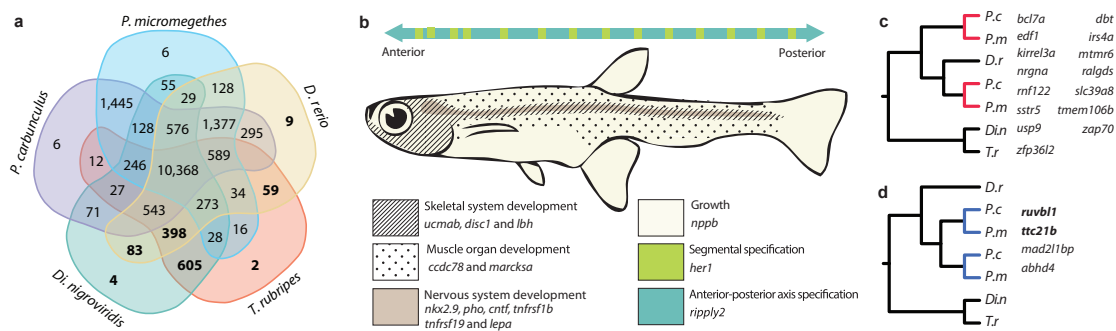

163  
 164  
 165 **Figure 2 | Gene loss and duplication of developmental process genes.** a) Five-species  
 166 comparison of shared orthogroups for the identification of genes lost in *Paedocypris*. Bold  
 167 numbers represent orthogroups without any *Paedocypris* orthologs. Orthogroups were identified  
 168 using OrthoFinder<sup>33</sup> on the basis of full protein datasets for all included species. b) Lost  
 169 developmental pathway genes and schematic representation of phenotypically affected body  
 170 segments in *Paedocypris*. c) Gene duplicates retained in *Paedocypris*. d) Genus specific gene  
 171 duplications. Genes in bold are associated with a truncated phenotype in *D. rerio*.  
 172  
 173 Because phenotypic changes can also result from gene duplication<sup>34,35</sup>, we  
 174 identified genes with two copies in *Paedocypris*, but only a single copy in

175 zebrafish and pufferfishes. Based on the topology of gene trees generated for  
176 these genes, we differentiated between genes originating from duplication  
177 events predating the divergence of *Paedocypris* and *Danio*, where only one copy  
178 is retained in zebrafish (Figure 2c), and *Paedocypris*-specific gene duplication  
179 events (Figure 2d). Interestingly, although only four genes could be identified as  
180 recent duplicates in *Paedocypris*, two of these (*ttc21b* and *ruvbl1*) are associated  
181 with deformed phenotypes in zebrafish, including shortening of the anterior-  
182 posterior axis and decreased head size<sup>32</sup>.

183

### 184 **Genome miniaturization through intron shortening**

185 In parallel to their miniaturized body size, the two *Paedocypris* species show a  
186 surprising evolutionary trajectory in terms of genome miniaturization.  
187 Compared to the genome sizes of zebrafish (~1,5 Gb)<sup>7,32</sup> and other cyprinid  
188 fishes (0.81–3.5 Gb)<sup>36</sup>, we find that the two *Paedocypris* species have  
189 substantially smaller genomes (0.45–0.52 Gb), yet similar numbers of genes  
190 (Table 1). Comparative analyses of vertebrate genomes have shown that genome  
191 size reduction is typically characterized by shorter introns and reduced repeat  
192 content<sup>37,38</sup>. However, substantial loss of protein-coding genes<sup>38,39</sup>, large  
193 segmental deletions facilitated by fission of macrochromosomes<sup>38</sup>, and a reduced  
194 rate of large insertions have also been demonstrated to play a role in reducing or  
195 constricting genome size<sup>37,40</sup>.

196 As the *Paedocypris* genome sizes are comparable to those of tetraodontid  
197 pufferfishes, we compared the gene repertoire of *Di. nigroviridis* and *T. rubripes*  
198 to that of *Paedocypris* and *D. rerio* to determine what genomic features are  
199 shared among these lineages. In order to obtain a consistent gene set for  
200 comparative analysis of gene-, exon-, and intron lengths, we categorized the full  
201 gene set of all five species into orthologous groups using the software  
202 OrthoFinder<sup>33</sup>. We identified 10,368 orthogroups containing genes from all five  
203 species (Figure 2a), which included 16,142 genes in zebrafish, 15,287 in *P.*  
204 *carbunculus*, 14,181 in *P. micromegethes*, 14,529 in *Di. nigroviridis*, and 14,393 in  
205 *T. rubripes*. The total gene length and the proportions of exonic and intronic  
206 regions for this gene set are shown in Figure 3a. Although the accumulative  
207 length of this gene set is significantly smaller in both *Paedocypris* species and the

208 two tetraodontids than in the zebrafish, the proportional change is more subtle,  
209 with the gene set constituting on average 29–30% of the total genome length in  
210 *Paedocypris* and the tetraodontids and 40% in zebrafish. Further, even though  
211 we detected minor differences in this gene set regarding the average number of  
212 exons per gene in *Paedocypris* (10.04) compared to *D. rerio* (11.21), the observed  
213 47% reduction in total exon length of *Paedocypris* in relation to zebrafish cannot  
214 be attributed to exon loss alone, as the two tetraodontids show very similar  
215 results to *Paedocypris* with even higher average exon count (11.89). However,  
216 the majority of the total gene length reduction observed in *Paedocypris* and  
217 tetraodontids is due to an 80–84% reduction in overall intron size (Figure 2a).  
218 To rule out that the overall reduction in intron size is driven by a highly deviant  
219 fraction of the *Paedocypris* and tetraodontid gene sets, we also investigated the  
220 distribution of gene-, exon-, and intron-lengths of this common gene set (Fig 2b).  
221 We observe that zebrafish has substantially fewer short genes compared to all  
222 other species, with an average gene length 4.3–5.5 longer than that of  
223 *Paedocypris* and tetraodontids. This is not unexpected, as previous studies have  
224 reported a lineage-specific expansion of intron size<sup>41</sup>, resulting in an additional  
225 peak of intron lengths between 1,000–2,000 bp in zebrafish, shown in Figure 3b.  
226 Based on our results, it is apparent that the reduced average gene length in  
227 *Paedocypris* is driven by a substantial shift towards consistently shorter introns,  
228 similar to, but not as extreme as, in the two tetraodontids. This is further  
229 illustrated by the calculated median sizes depicted in Fig. 3b.



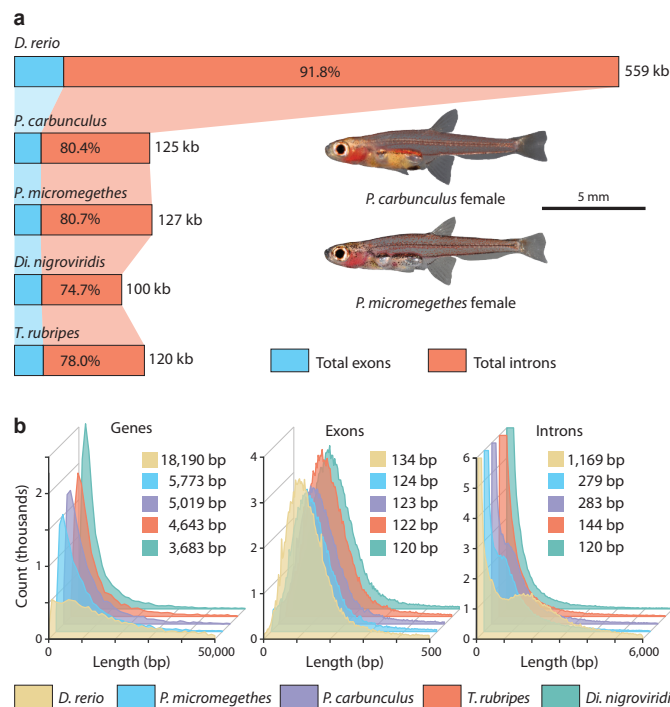

230

231

**Figure 3 | Comparative analyses of repeat content and gene space in zebrafish and**

232

***Paedocypris*. a) Total gene length of 14–16,000 genes belonging to common orthogroups, and**

233

the proportional contribution of exonic and intronic regions, in zebrafish, *Paedocypris*, and

234

tetraodontids. b) Frequency plot and median values of gene-, exon-, and intron lengths for the

235

common gene set. In all distributions, the values for both *Paedocypris* species are significantly

236

lower than in zebrafish, but significantly greater than those of both tetraodontids. (Wilcoxon

237

Rank Sum test,  $p < 10^{-15}$ ). Significant results were not detected for intron- and exon lengths

238

between the two *Paedocypris* species; however, in terms of gene lengths, *P. micromegethes* was

239

reported to be significantly longer.

240

241

**Repeat content reduction and genome evolution**

242

The genome size of an organism evolves through the relative rate of insertions

243

and deletions and through the effect of natural selection that either favors or

244

eliminates these changes. Genome shrinkage has thus been postulated to evolve

245

through a bias in the rate of insertions relative to deletions<sup>42</sup>, but the impact of

246

this mechanism, and its importance in genome size evolution is still debated<sup>43</sup>.

247

Importantly, even though deletions indeed appear to be more frequent than

248

insertions, the latter tend to include significantly more base pairs, resulting in

249

the gradual increase in genome size in eukaryotes<sup>42</sup>. Although several other

250

types of mutational activity can promote genome-size expansion, self-replicating

251

mobile elements (*i.e.* transposons) have been identified as the most prominent

252 contributor in this regard<sup>44,45</sup>, and recent studies have confirmed a strong  
 253 correlation between genome size and the amount of transposable elements (TEs)  
 254 in teleost fishes and other vertebrates<sup>46,47</sup>. Because the more compact genomes  
 255 have previously been shown to harbor fewer repeats<sup>38</sup>, we investigated the  
 256 degree to which this was the case in *Paedocypris*. Using a *Danio*-specific repeat  
 257 library, we determined the total amount of TEs; DNA-transposons, long- and  
 258 short interspersed repeats (LINEs and SINEs), and long terminal repeats (LTRs)  
 259 in the genomes of *Paedocypris*, zebrafish, and four other cyprinid species  
 260 (*Cyprinus carpio*, *Pimephales promelas*, *Sinocyclocheilus grahami*, and *Leuciscus*  
 261 *waleckii*) in addition to the characiform cave tetra (*Astyanax mexicanus*) using  
 262 Repeatmasker<sup>48</sup>. The repeat landscape graphs, illustrating the relative amount of  
 263 each TE class and the Kimura distance<sup>49</sup> for each of these are shown in Figure 4a  
 264 along with a time-calibrated phylogeny of these eight species, as inferred using  
 265 BEAST<sup>50</sup> (see Methods). Figure 4a also shows the percentage of each repeat type  
 266 of various age categories, calculated following Kapusta, *et al.* 2017)<sup>47</sup>. The total  
 267 number of repetitive elements of each class is shown in Figure 4b, clearly  
 268 illustrating that even though the proportional differences in repeat content is  
 269 similar between *Paedocypris* and the other cyprinids, the total number of  
 270 elements is much lower.

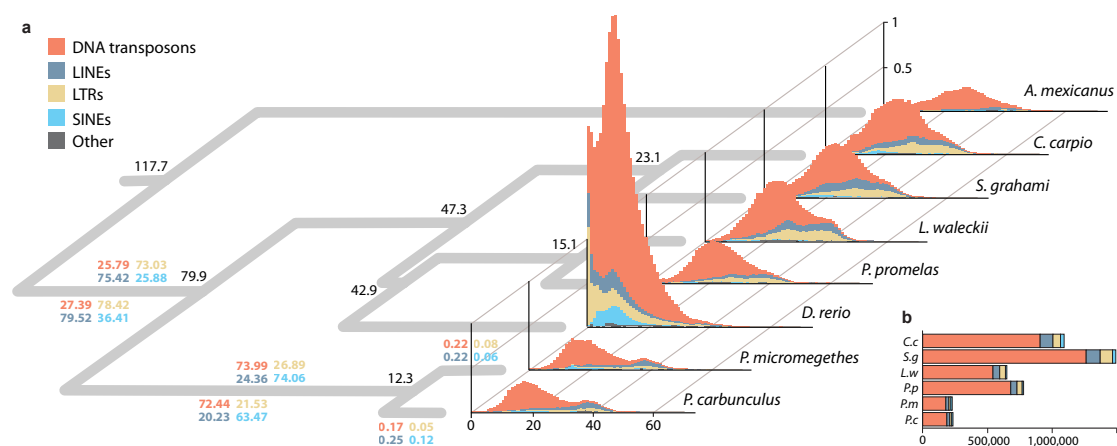

271  
 272 **Figure 4 | Repeat landscape graphs showing the prevalence and relative age of the four**  
 273 **main repeat classes in *Paedocypris* compared to six other teleost genome assemblies. a)**  
 274 Phylogeny with divergence times for the internal nodes for the eight species analyzed. Colored  
 275 numbers on the branch leading to *Paedocypris* show the percentages of each of the  
 276 corresponding repeat classes that originate from the time interval corresponding to this branch  
 277 (117.7–79.9, 79.9–12.3, and more recent than 12.3 Ma). Repeat landscapes represent  
 278 transposable elements of the four main classes as well as the unclassified ones. The x-axis

279 indicates the Kimura distance<sup>49</sup> as a proxy for time while the y-axis gives the relative coverage of  
280 each repeat class based on the genome size. b) Total number of repetitive elements in each of the  
281 cyprinid genomes (excluding zebrafish); colored by class.

282

283 Consistent with previous reports<sup>46</sup>, we find that the zebrafish genome is  
284 dominated by repetitive elements, constituting 58.1% of its genome. In contrast,  
285 only 15.3 – 15.5% of the *Paedocypris* genomes consist of repetitive elements  
286 (transposable elements, satellites, simple repeats, and low complexity regions), a  
287 percentage that is comparable to that of the other cyprinids investigated (12.3–  
288 19.01%). However, in terms of TE content, the *Paedocypris* species have  
289 considerably fewer and shorter elements that comprise in total 7.24 and 7.30%  
290 of their genomes, compared to the four other cyprinids in which we find on  
291 average a genomic proportion of 13.81% (not including zebrafish in which these  
292 constitute 53.28% of the genome)(Supplementary Table 4). Based on the timing  
293 of the divergence events leading to crown *Paedocypris* and the calculated  
294 substitution rate (see Methods), we investigated the proportions of “ancient” and  
295 “lineage specific” TEs. Interestingly, only 0.05 – 0.25% of the *Paedocypris*  
296 transposons appear to have been incorporated into their genomes after these  
297 two species diverged (Figure 4).

298 As *Paedocypris* thus appears to have reversed the general trend of DNA  
299 gain<sup>43,43</sup> towards gradual DNA loss, as indicated by their low TE content, we  
300 investigated whether this could have been achieved through silencing of  
301 transposon activity<sup>40</sup>. We thus explored the genomic content of the PIWI-like  
302 genes (*PIWI1* and *PIWI2*), which are known for silencing transposons in  
303 zebrafish and other vertebrates<sup>51,52</sup>. Interestingly, we identified additional copies  
304 of *PIWI1* in both *Paedocypris* genomes, located in a conserved region ~4 Mb  
305 upstream of *PIWI1* on zebrafish chromosome 8, as shown in Figure 5. One of  
306 these gene duplications is shared between the two *Paedocypris* species and  
307 therefore appears to have evolved prior to their divergence, while an additional,  
308 third copy is found exclusively in *P. carbunculus* (Fig. 5a). These lineage-specific  
309 duplications suggest that the gradual genome miniaturization has been, at least  
310 in part, attained through increased transposon silencing, leading to a bias of DNA  
311 loss over DNA gain. This needs to be tested further, utilizing genomic sequences

312 from other closely related cyprinids like *Danionella* and *Sundadanio*. Probably  
 313 resulting from the lineage-specific whole genome duplication, a single duplicate  
 314 of the *PIWII1* gene was also found in *C. carpio*, but no extra copies could be  
 315 detected in the other cyprinids; *P. promelas*, *L. waleckii*, or *S. grahami*. No  
 316 additional copies of *PIWII2* were detected in either *Paedocypris* or the other  
 317 cyprinids.

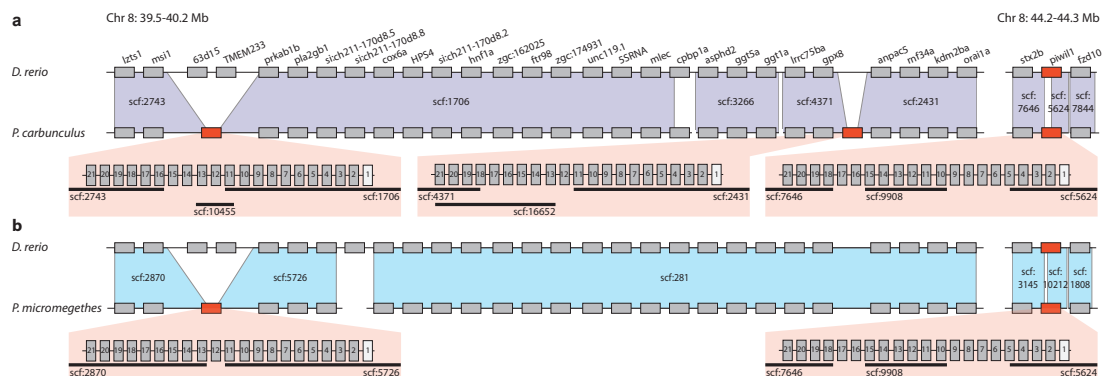

318  
 319 **Figure 5 | Synteny of the *PIWII1* loci and surrounding regions in the zebrafish and**  
 320 ***Paedocypris* genomes.** a) Synteny between zebrafish (top) and *P. carbunculus*, showing the  
 321 original *PIWII1* copy (right red rectangle) and the two additional copies (left and middle red  
 322 rectangles) detected in this genome assembly. b) Same as a) for *P. micromegethes*, showing the  
 323 single, presumably ancestral, duplicated copy of *PIWII1* in this genome. Transparent red boxes  
 324 depict the exon-intron structure of all *PIWII1* genes in *Paedocypris* with black lines representing  
 325 the scaffolds covering each region. Not all exons could be recovered for all gene copies.

326

### 327 **Chromosome fusion**

328 Another interesting feature of the miniaturized genome of *Paedocypris* is the  
 329 reduced number of chromosomes compared to that of zebrafish. While most  
 330 Cypriniformes have  $\geq 24$  chromosomes<sup>53</sup> in the haploid metaphase and zebrafish  
 331 has 25, *P. carbunculus* only features 15 chromosomes<sup>54</sup>. Since we did not find any  
 332 indication of large-scale chromosome loss, as would be indicated by substantial  
 333 gene loss, this discrepancy implies that genome miniaturization in *Paedocypris*  
 334 spp. has been accompanied by chromosomal fusion since they diverged from  
 335 their last common ancestor with zebrafish. In order to identify regions on  
 336 different chromosomes in the zebrafish genome that are now tightly linked in the  
 337 *Paedocypris* genome, we looked for syntenic regions in *Paedocypris* that contain  
 338 at least six genes from two different chromosomes in zebrafish. Figure 6 shows  
 339 the three scaffolds identified in each of the *Paedocypris* species fulfilling these

340 criteria. In both species, nine genes from chromosomes 9 and 21 in zebrafish are  
341 co-localized on a single scaffold. For chromosome 11 in zebrafish, we find good  
342 evidence in different regions for a fusion with chromosome 1 in *P. carbunculus*  
343 but also chromosome 2 in *P. micromegethes*, suggesting that either all three  
344 chromosomes may have fused or that species-specific fusion events may have  
345 occurred. Although the remaining two putative fusion events can only be  
346 detected in one of the species, there are no contradicting results between the  
347 two *Paedocypris* species, indicating that fusion of the chromosome pairs 6 and 19  
348 and 22 and 25 is likely to have occurred in the last common ancestor of both  
349 species.

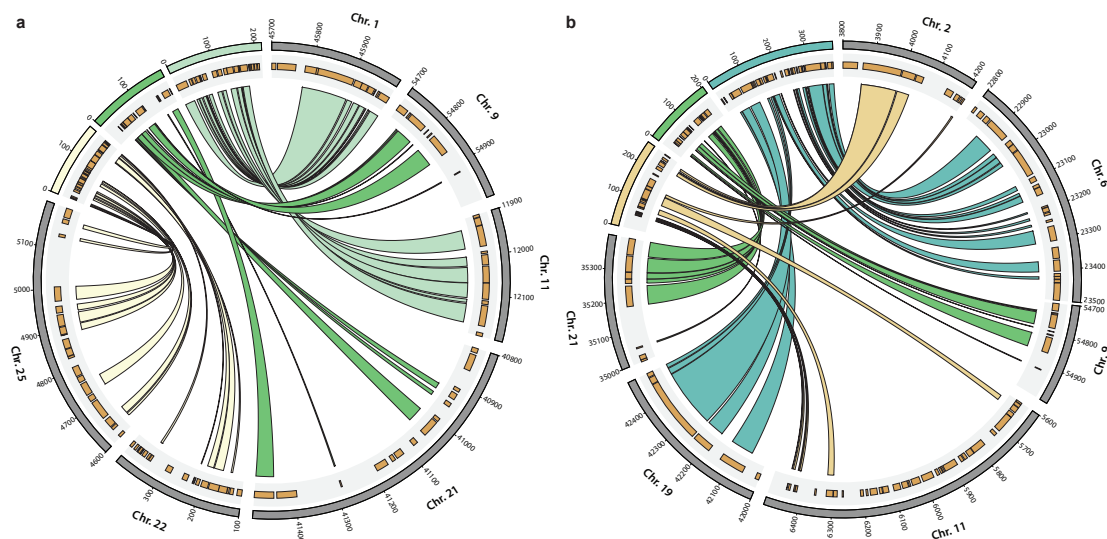

350  
351 **Figure 6 | Syntenic regions between zebrafish chromosomes and *Paedocypris* scaffolds.**  
352 Syntenic regions between zebrafish (*D. rerio*) and *P. carbunculus* (a) or *P. micromegethes* (b).  
353 Links between *Paedocypris* scaffolds and *D. rerio* chromosomes indicate orthologous genes. Only  
354 the relevant parts of *D. rerio* chromosomes are shown and the locations of all genes in these  
355 regions are illustrated in the gray shaded areas. Numbers on scaffolds and chromosomes are  
356 given as kbp.

357

## 358 Discussion

359 Miniature body size has evolved several times within Cyprinidae<sup>13</sup>. However,  
360 little is known about the molecular underpinnings of these miniaturization  
361 events, whether these are similar in several instances of miniaturization, and to  
362 what extent the parallel evolution of genomic and phenotypic traits is coupled.  
363 Given the identification of several classical signatures of genome reduction,  
364 including reduced TE content and smaller introns, we conclude that the small

365 *Paedocypris* genomes represent a derived state, having evolved from an ancestor  
366 with a substantially larger genome and a larger body size. Reduced genome size  
367 has also been reported in other vertebrates<sup>37,38</sup>, yet these reductions include  
368 large segmental deletions, chromosome fissions, and massive losses of protein  
369 coding genes, which we do not observe in the miniaturized genomes of  
370 *Paedocypris*. Moreover, while reduced genome sizes in birds and bats can  
371 probably be explained by the adaptation to flight through the need for higher  
372 metabolic rates<sup>55</sup>, the causes of genome size reduction in fishes seem in general  
373 less apparent. However, the reduced genome sizes in *Paedocypris* may also have  
374 evolved as a response to a selection for higher metabolic rate, mediated in this  
375 case by its extreme habitat (*i.e.* low oxygen concentrations and pH < 4.0) rather  
376 than rapid locomotion.

377 Small body size has arisen among miniature cyprinids in two different  
378 ways, either as proportionate dwarfism, resulting in miniature but otherwise  
379 identical copies of their larger ancestors, or through developmental truncation  
380 or progenesis leading to larval appearance of the tiny mature fish<sup>13,14</sup>.  
381 Evolutionary novelties such as highly modified pelvic and pectoral girdles<sup>14</sup>, an  
382 anterior shift in genital pore and anus<sup>13</sup>, and fang-like structures forming from  
383 the jaw bones<sup>16</sup>, however, appear to be restricted to developmentally truncated  
384 miniatures (*e.g.* *Paedocypris*, *Danionella*, and *Sundadanio*). The absence of  
385 novelties in proportioned dwarfs would suggest that developmental truncation  
386 plays an important role in escaping evolutionary and developmental constraints  
387 imposed by the species' *Bauplan* and in opening up new evolutionary avenues  
388 for drastic morphological change<sup>14,16,18</sup>.

389 This study represents the first report on genomes of highly  
390 developmentally truncated fish species. It illustrates how the unique features of  
391 *Paedocypris* at the phenotypic level (*i.e.* extreme miniaturization and dramatic  
392 developmental truncation) are paralleled at the genomic level, in the form of  
393 substantially smaller genomes via reduced intron lengths and lower repeat  
394 content, and also through the loss of numerous genes related to development,  
395 including highly important *Hox* genes. Although a causal link between  
396 miniaturized body size and reduced genome size remains to be established, our  
397 study highlights the potential to investigate such connections in a comparative

398 framework, including the sequencing of additional species representing other  
399 miniature genera. Nevertheless, these naturally simplified species, having  
400 escaped the developmental, and, as we report here, genetic constraints of the  
401 cyprinid *Bauplan*, present a novel opportunity to investigate phenotype–  
402 genotype relationships in vertebrate development. These naturally occurring  
403 extreme phenotypes will greatly aid future research on model organisms and our  
404 quest to understand how phenotypic diversity is generated during vertebrate  
405 evolution and development.

406         Recent investigation of the Gulf pipefish genome<sup>56</sup> has revealed a loss of the  
407 last *Hox7* paralog in this species. This has revived the disputed hypothesis that  
408 the lack of ribs in both pufferfish and the pipefishes can be attributed to the fact  
409 that none of these species have any remaining *Hox7* paralogs<sup>57</sup>. Interestingly, the  
410 *Paedocypris* species show a similar loss of the last *Hox7* paralog (*hoxb7a*), yet the  
411 two species investigated here do feature ribs. The ribs are, however, reduced and  
412 remain poorly ossified<sup>14</sup>, suggesting that although the *Hoxa7/Hoxb7* genes are  
413 not the only essential genes for rib development, they do appear to have an  
414 influence on their development, as suggested by earlier experiments in mice<sup>58</sup>.

415         Finally, the observed loss of *Hox13* genes (*Cb* and *Da*) in the two  
416 *Paedocypris* species is of special interest as these genes represent the  
417 termination of the patterning system. *Hoxd13* was also one of the genes targeted  
418 in the successful CRISPR-Cas9 knockout experiment in the zebrafish<sup>59</sup>, that  
419 showed that the *Hox* genes play a very similar role in patterning during  
420 development of both fins bones, and thus elucidated the evolutionary transition  
421 from fins to limbs. We propose that future studies of similar nature should  
422 consider using *Paedocypris* species as a complementary system to the zebrafish  
423 model, due to its already limited *Hox* gene repertoire, yet relatively close  
424 phylogenetic relationship with zebrafish.

425

## 426 **Materials and methods**

### 427 **Specimens used**

428 *P. carbunculus* was caught at the type locality in Pangkalanbun, Kalimantan  
429 Tengah, on the island of Borneo and *P. micromegethes* was caught in Sibuluan,  
430 Sarawak, Malaysia, on the island of Borneo. Both species were caught using dip

431 nets. Immediately upon capture, specimens were killed by an overdose of  
432 anesthesia (MS222) following guidelines by the American Society of  
433 Ichthyologists and Herpetologists (ASIH) (<http://www.asih.org/pubs/>; issued  
434 2013). Individuals were preserved in 96% ethanol for subsequent DNA analyses.

435

#### 436 **DNA isolation**

437 A single whole specimen of each *Paedocypris* species, stored on 96% ethanol,  
438 was used for isolation of high molecular genomic DNA with the EZNA Tissue  
439 DNA Kit (Omega Bio-Tek, Norcross, Georgia, USA), following manufacturer`s  
440 instructions. Sample identifiers were LR12004 (*Paedocypris carbunculus*) and  
441 LR7898 (*Paedocypris micromegethes*), supplied by Lukas Rüber.

442

#### 443 **Sequencing library preparation**

444 Genomic DNA samples were fragmented to lengths of ~550 bp by sonication on a  
445 Covaris E220 (Life Technologies, Carlsbad, California, USA) with the following  
446 settings: 200 cycles for 45 seconds with Peak Incident Power of 175 W and  
447 frequency sweeping mode. All sequencing libraries were constructed following  
448 Illumina`s TrueSeq PCR-free library preparation protocol for 550 bp fragments.

449

#### 450 **Whole genome sequencing**

451 Based on expected genome sizes of 315-350 Mb<sup>54</sup>, both *Paedocypris* genomes  
452 were sequenced to ~90× coverage on the Illumina HiSeq 2500 platform, with  
453 the Illumina 500 cycles kit (Rapid mode) with on-board clustering. Per species,  
454 this produced 151-155 M paired reads of 250 bp each.

455 The Kapa Library quantification kit for Illumina (Kapa Biosciences, Wilmington,  
456 Massachusetts, USA) was used to find the correct molarity (nM) before  
457 sequencing.

458

#### 459 **Genome assembly**

460 Both *Paedocypris* genomes were initially assembled using two different assembly  
461 programs, the “Overlap-Layout-Consensus” based Celera Assembler<sup>60</sup> and the  
462 “de Bruijn graph” based DISCOVAR *de novo*<sup>61</sup>. We then used the Metassembler  
463 software<sup>62</sup> to merge and optimize these two assemblies, producing a



464 reconsolidated single assembly with superior quality for each of the two  
465 *Paedocypris* species (Table 1, Supplementary Note, and Supplementary Table 5).

466

### 467 **Assembly quality assessment**

468 The quality of the different genome assemblies was assessed by comparing the  
469 proportion of conserved genes detected, as a measure of gene-space  
470 completeness. We used the program BUSCO v2.0 (Benchmarking Universal  
471 Single-Copy Orthologs)<sup>63</sup>, which searches for 4,584 highly conserved single-copy  
472 actinopterygian genes. Results are listed in Table 1.

473 We also assessed the assembly quality of the three different assembly  
474 versions with the software FRC<sup>bam</sup> [64], which identifies “features” (incorrectly  
475 mapped reads, incorrect insert size, coverage issues, etc.) in each of the  
476 assemblies, and ranks the different assembly versions according to the number  
477 of detected features. Additional information on the execution of these programs  
478 is available in the Supplementary Note and the resulting graphs are presented in  
479 Supplementary Figs. 1 and 2.

480

### 481 **Annotation**

482 Structural and functional annotation of both reconsolidated *Paedocypris*  
483 genomes was performed with two iterative rounds of the MAKER2 (v 2.31.8)<sup>65-67</sup>  
484 pipeline, following the instructions by Sujai Kumar (available at  
485 [https://github.com/sujaikumar/assemblage/blob/master/README-](https://github.com/sujaikumar/assemblage/blob/master/README-annotation.md)  
486 [annotation.md](https://github.com/sujaikumar/assemblage/blob/master/README-annotation.md)). Numbers of genes annotated are listed in Table 1. See  
487 Supplementary Note for in-depth descriptions of additional software and  
488 commands used.

489

### 490 **Table 1**

491 *Assembly statistics, gene-space completeness-, and annotation metrics.*

|                                        | <i>P. carbunculus</i> | <i>P. micromegethes</i> |
|----------------------------------------|-----------------------|-------------------------|
| Total assembly length (bp)             | 430,790,821           | 414,707,736             |
| Estimated assembly coverage (CA / DDN) | 67× / 73×             | 76× / 91×               |
| Number of scaffolds                    | 18,953                | 15,158                  |
| N50 scaffold length                    | 59,252                | 61,901                  |
| Longest scaffold (bp)                  | 653,275               | 678,207                 |
| BUSCOs found <sup>2</sup>              | 4,113                 | 4,073                   |
| BUSCOs complete <sup>2</sup>           | 3,719                 | 3,564                   |

| Total gene count <sup>3</sup> | 25,567                                                                                                                                         | 25,453 |
|-------------------------------|------------------------------------------------------------------------------------------------------------------------------------------------|--------|
| 492                           | <sup>1</sup> Out of 4,584 highly conserved Actinopterygii genes                                                                                |        |
| 493                           | <sup>2</sup> Annotation Edit Distance (AED) < 1.0 or containing a protein family (Pfam) domain                                                 |        |
| 494                           | <sup>3</sup> Based on OrthoFinder <sup>33</sup> comparative analysis between zebrafish ( <i>D. rerio</i> ) and both <i>Paedocypris</i> species |        |
| 495                           |                                                                                                                                                |        |

## 496 **Hox gene search**

497 In addition to the two *Paedocypris* genomes, *Hox* gene content was also  
498 investigated in the genomes of *Pimephales promelas*  
499 (GCA\_000700825.1\_FHM\_SOAPdenovo\_genomic.fna) and *Leuciscus waleckii*  
500 (GCA\_900092035.1\_Amur\_ide\_genome\_genomic.fa) based on BLAST<sup>68</sup> searches,  
501 using 70 zebrafish *Hox* transcripts from Ensembl as queries (including some  
502 truncated variants and isoforms), representing the 49 unique *Hox* genes  
503 (Supplementary Table 1). The similarity stringency threshold used in these  
504 searches was  $1e^{-20}$ . We also conducted additional searches using Exonerate  
505 v2.2.0<sup>69</sup> for genes whose presence could not be established based on the BLAST  
506 search. For those genes that could not be detected using either method,  
507 additional searches were conducted using the orthologous protein sequence  
508 from the cave tetra (*Astyanax mexicanus*). Contiguous sequences from both  
509 *Paedocypris* genomes were extracted from the scaffolds assembled with  
510 Metassembler, spanning all hit regions plus 10 kb upstream and downstream of  
511 each hit. These scaffold sequences were aligned to the orthologous sequences  
512 extracted from the zebrafish genome (GRCz10) using mVista<sup>70</sup>.

513

## 514 **Identification of lost and expanded developmental genes**

515 In order to obtain a complete list of genes from *D. rerio* that were associated with  
516 various developmental pathways that could be compromised in *Paedocypris*, we  
517 started out with the orthogroups found not to contain orthologs from either  
518 *Paedocypris* species, as identified using OrthoFinder<sup>33</sup>. We further utilized the  
519 gene ontology information associated with all genes belonging to these  
520 orthogroups, and identified key gene ontology terms: GO:0009948 (anterior-  
521 posterior axis formation), GO:0009950 (dorsal-ventral axis formation),  
522 GO:0040007 (growth), GO:0007517 (muscle organ development), GO:0007399  
523 (nervous system development), GO:0001501 (skeletal system development), and  
524 GO:0007379 (segment specification). This data set contained 1,581 unique genes  
525 from *D. rerio*, and 64 of these genes could not be detected in the *Paedocypris*

526 genome sequences using TBLASTN<sup>68</sup> with a similarity cutoff of  $1e^{-20}$ , and their  
527 presence was further examined by running Exonerate<sup>69</sup> (v2.2.0). Based on the  
528 Exonerate results, reciprocal BLAST searches, annotation, and identification of  
529 flanking genes, we could confidently determine that 14 of these genes were  
530 indeed not present in either of the *Paedocypris* genomes. Using expression data  
531 from Ensembl<sup>32</sup>, we reconstructed the hypothetically affected body segments in  
532 *Paedocypris*, as illustrated in Figure 2b.

533 We further investigated whether we could confidently identify  
534 developmental genes that are now duplicated in *Paedocypris* but not in *D. rerio*.  
535 From the full list of orthogroups, we identified 138 groups that were represented  
536 by a single copy in the two tetraodontid pufferfishes and in *D. rerio*, but by two  
537 apparent copies in both *Paedocypris* species. The alignments of these genes were  
538 then screened for missing data, and based on manual inspection of these  
539 alignments, only alignments with < 35% missing data were included in further  
540 analysis. Out of the 35 genes that met this criterion, 19 could be confirmed  
541 through annotation, and had a gene tree consistent with the two hypotheses  
542 outlined in Figure 2c and 2d.

543

#### 544 **Gene space evolution**

545 In order to assess the changes of gene-, exon-, and intron sizes in *Paedocypris* we  
546 first identified the proteomic overlap of *Paedocypris*, *D. rerio*, *Di. nigroviridis*, and  
547 *T. rubripes* by running the software OrthoFinder<sup>33</sup> on the complete protein sets  
548 of these five species. We used the full protein sets from Ensembl<sup>32</sup> (v. 80): *D.*  
549 *rerio* (GRCz10), *Di. nigroviridis* (TETRAODON8), and *T. rubripes*(FUGU4).

550 However, as some of the *D. rerio* genes have more than one protein or transcript  
551 in the Ensembl database, the output from BioMart (31,953 genes and 57,349  
552 proteins) was filtered so that only the longest protein sequence from each gene  
553 was used in the analysis, and genes without protein sequences were removed.  
554 This resulted in a set of 25,460 genes with a single protein prediction. For the  
555 *Paedocypris* species, the “standard” gene sets resulting from the annotation were  
556 used as input. These sets were filtered to include only genes with AED  
557 (Annotation Edit Distance) scores < 1 or those with a Pfam domain. By using only  
558 genes belonging to the 10,368 orthogroups found to contain orthologs from all

559 these species (Fig. 2a), we obtained a comprehensive but conservative dataset as  
560 the basis for these analyses. Information about each of the corresponding genes  
561 in *D. rerio*, *Di. nigroviridis*, and *T. rubripes* was obtained from BioMart, and  
562 included the Ensembl gene and protein ID, and the chromosome name in  
563 addition to the start and stop position for each gene, transcript, and exon. Intron  
564 sizes were then calculated on the basis of exon positions, using a custom script  
565 (“gene\_stats\_from\_BioMart.rb”). In some cases, the sum of exons and introns did  
566 not equal the total length of a gene, which appears to be caused by inconsistency  
567 in the registration of UTR regions in the Ensembl database for individual genes.  
568 In these cases, to be conservative with regard to intron length estimates, the  
569 gene length was shortened to correspond to the sum of the exons and the  
570 corresponding introns between these.

571 Intron and exon lengths for the two *Paedocypris* species were calculated  
572 in a similar manner, but on the basis of the “standard” filtered annotation file in  
573 “gff” format produced as part of the annotation pipeline. Also for these species,  
574 the intron lengths were determined on the basis of identified exons, with another  
575 custom script (“gene\_stats\_from\_gff.rb”). Gene-, exon-, and intron length  
576 histograms were plotted with the R package ggplot2. Custom Ruby scripts are  
577 available for download at [https://github.com/uio-cees/Paedocypris\\_gene\\_stats](https://github.com/uio-cees/Paedocypris_gene_stats)

578

### 579 **Repeat content analysis**

580 The repeat contents of the two *Paedocypris* genomes and the model organism  
581 genomes were assessed using RepeatMasker (v4.0.6)<sup>48</sup> with the *Danio*-specific  
582 repeat library included in the program, and with the “-s” setting to increase  
583 sensitivity. The following model organism genome assemblies were used in this  
584 comparison: *D. rerio* (Danio\_rerio.GRCz10.dna.toplevel.fa), *P. promelas*  
585 (GCA\_000700825.1\_FHM\_SOAPdenovo\_genomic.fna), *L. waleckii*  
586 (GCA\_900092035.1\_Amur\_ide\_genome\_genomic.fna), *Sinocyclocheilus grahami*  
587 (GCA\_001515645.1\_SAMN03320097.WGS\_v1.1\_genomic.fna), *Cyprinus carpio*  
588 (GCA\_001270105.1\_ASM127010v1\_genomic.fna), and *A. mexicanus*  
589 (*Astyanax mexicanus*.AstMex102.dna.toplevel.fa). Repeat landscape graphs (Fig.  
590 4a) were plotted with the R package ggplot2 based on the “.aligned” output file  
591 from RepeatMasker. The proportion of repeats originating from specific time

592 intervals was calculated using the parseRM.pl script<sup>47</sup> (available at  
593 <https://github.com/4ureliek/Parsing-RepeatMasker-Outputs>), using the  
594 *Paedocypris*-specific substitution rate and the "--age" setting set to "12.31,79.98",  
595 according to divergence times estimated with BEAST2. All four repeat classes  
596 were analyzed individually using the "--contain" setting.

597

### 598 **Calculation of substitution rate for *Paedocypris***

599 The *Paedocypris*-specific substitution rate was calculated on the basis of a whole  
600 genome alignment of the two *Paedocypris* species. These alignments were  
601 created by mapping the sequencing reads of *P. micromegethes* to the *P.*  
602 *carbunculus* assembly using BWA (Burrows-Wheeler Aligner) (v. 0.7.12)<sup>71</sup> and  
603 SAMTOOLS (v. 1.3.1)<sup>72,73</sup>. The number of nucleotide differences in each of the  
604 18,953 alignments (one per scaffold) was identified using a custom script  
605 ("find\_variable\_sites.rb", available for download at [https://github.com/uioces/Paedocypris\\_gene\\_stats](https://github.com/uioces/Paedocypris_gene_stats)). The substitution rate per million years  
606 (0.001288) was then calculated as the sum of total differences (13,415,043)  
607 divided by the total number of aligned sites (422,829,036) and two times the  
608 estimated crown age of *Paedocypris* (12.31), as inferred by the BEAST v.2.4.5<sup>50</sup>  
609 analysis.

610

### 612 **Phylogenetic inference of selected otophysan species**

613 To allow the estimation of divergence times between the two *Paedocypris*  
614 species and six other otophysan taxa for which genomic resources were available  
615 (*D. rerio*, *A. mexicanus*, *C. carpio*, *P. promelas*, *S. grahami*, and *L. waleckii*), we  
616 followed the pipeline for phylogenetic marker selection presented in Malmstrøm  
617 et al. (2016 and 2017)<sup>74,75</sup> with few modifications. These modifications included  
618 the following changes: Marker selection began with a set of 3,238 cave fish (*A.*  
619 *mexicanus*) exons, for which at least five orthologs were known among the seven  
620 species *D. rerio*, *Gadus morhua*, *Gasterosteus aculeatus*, *Oreochromis niloticus*,  
621 *Oryzias latipes*, *Poecilia formosa*, and *T. rubripes*, according to version 87 of the  
622 Ensembl database. This marker set was then used to identify potential orthologs  
623 from the genomes of the eight selected otophysan taxa based on TBLASTN<sup>68</sup>  
624 searches followed by a strict filtering procedure. Compared to Malmstrøm et al.

625 (2016), we applied a lower dN/dS threshold of 0.25 to exclude markers  
626 potentially affected by positive selection, and we removed all markers for which  
627 no homologs could be detected in one or more of the eight otophysan genomes.  
628 We also applied stricter thresholds on clock-like evolution of candidate markers,  
629 so that all genes with an estimated coefficient of rate variation above 0.8 as well  
630 as those with a mean mutation rate above 0.0004 per site per million years were  
631 excluded. We identified 138 genes with a total alignment length of 135,286 bp  
632 which were subsequently used for analysis with BEAST v.2.4.5<sup>50</sup>. Since the  
633 topology of otophysan taxa has previously been resolved with a more  
634 comprehensive phylogenetic dataset<sup>21</sup>, we here focused on the inference of  
635 divergence times only, by using the topology inferred by Stout et al. (2016) as a  
636 starting tree and excluding all of BEAST2's operators on the tree topology.  
637 Divergence times were estimated by calibrating the most recent common  
638 ancestor of Cypriniformes and Characiformes with a lognormal distribution  
639 centered at 121 Ma (standard deviation on log scale: 0.1) according to the results  
640 of Malmstrøm et al. (2016). We performed two replicate BEAST2 analyses with  
641 800 million MCMC iterations, of which the first 100 million were discarded as  
642 burnin. Convergence was assessed based on similarity of parameter traces  
643 between run replicates and effective sample sizes (ESS) greater than 200. A  
644 maximum clade credibility (MCC) summary tree with node heights according to  
645 mean age estimates was produced with TreeAnnotator v.2.1.2<sup>50</sup>.

646

#### 647 **Identification of PIWI-like genes**

648 We investigated the presence of PIWI-like genes in the genomes of the two  
649 *Paedocypris* species and the other cyprinids using Exonerate<sup>69</sup> (v2.2.0) with the  
650 longest transcripts available for the two PIWI-like homologs from zebrafish;  
651 *PIWI1* (ENSDARG00000041699) and *PIWI2* (ENSDARG00000062601). Regions  
652 containing sequences spanning more than three introns were aligned to the  
653 zebrafish exons using mafft<sup>76</sup> as implemented in AliView<sup>77</sup> (v1.17.1). Intron  
654 sequences were aligned manually based on the established exon structure, using  
655 the full-length scaffold sequences. Local gene synteny to zebrafish chromosome  
656 8, surrounding the putative *PIWI1* copies, was confirmed through reciprocal

657 BLAST searches using both the MAKER2 annotated proteins and proteins  
658 predicted by GeneScan (online version)<sup>78</sup> as queries.

659

### 660 **Identification of chromosomal rearrangements (fusions)**

661 As *P. carbunculus* has been shown to have a haploid chromosome count of 15  
662 [54], potential chromosomal fusions were investigated on the basis of disrupted  
663 synteny of zebrafish chromosomes in relation to *Paedocypris*.

664 We identified putative homologous regions between the zebrafish genome  
665 assembly and each of the *Paedocypris* species' genome assemblies by using  
666 MCScanX<sup>79</sup>. In short, the predicted proteins for each *Paedocypris* species were  
667 merged with predicted proteins from zebrafish into a single file, and BLASTP<sup>68</sup>  
668 was executed with this file as both query and target, thus identifying putative  
669 homologs both within each species and between. The genomics positions of the  
670 proteins were extracted from the annotation files, and the BLASTP results and  
671 the genomic positions were provided to MCScanX for identifying the putative  
672 homologous regions.

673

### 674 **Acknowledgments**

675 Fieldwork in the peat swamp forests in Malaysia and Indonesia was funded by  
676 the Natural Environmental Research Council (NERC; NE/F003749/1, to L.R. and  
677 R.B.), National Geographic (8509-08, to L.R.), and the North of England  
678 Zoological Society (to L.R.). Fieldwork in Sarawak was conducted under permits  
679 issued by the Economic Planning Unit, Prime Minister's Department, Malaysia  
680 UPE 40/200/19/2534) and the Forest Department Sarawak (NCCD.970.4.4[V]-  
681 43) and fieldwork in Indonesia was conducted under permits issued by the  
682 Indonesian Institute of Sciences (LIPI) and the Kementerian Negara Riset dan  
683 Teknologi (RISTEK; 3/TKPIPA/FRP/SM/III/2012). We thank E. Adamson H.  
684 Budianto H. Ganatpathy, S. Lavoué, M. Lo, H. Michael, and S. Sauri for their help in  
685 the field. All computational work was performed on the Abel Supercomputing  
686 Cluster (Norwegian metacenter for High Performance Computing (NOTUR) and  
687 the University of Oslo) operated by the Research Computing Services group at  
688 USIT, the University of Oslo IT-department. Sequencing library creation and  
689 high-throughput sequencing were carried out at the Norwegian Sequencing

690 Centre (NSC), University of Oslo, Norway. This work was funded by grants from  
691 the Naturhistorisches Museum der Burgergemeinde Bern to L.R. and the  
692 Research Council of Norway (RCN grants 199806 and 222378) to K.S.J. H.H.T  
693 acknowledges funding from the National University of Singapore (NUS, R-154-  
694 000-318-112) and Lee Kong Chian Natural History Museum. W.S. acknowledges  
695 funding from the European Research Council (ERC) and the Swiss National  
696 Science Foundation (SNF).

697

## 698 **Competing financial interests**

699 The authors declare no competing financial interests.

700

## 701 **References**

- 702 1. Carroll, S. P., Hendry, A. P., Reznick, D. N. & Fox, C. W. Evolution on  
703 ecological time-scales. *Func. Ecol.* **21**, 387–393 (2007).
- 704 2. Moczek, A. P., Sultan, S., Foster, S., Ledón-Rettig, C., Dworkin, I., Nijhout, H.  
705 F., Abouheif, E. & Pfennig, D. W. The role of developmental plasticity in  
706 evolutionary innovation. *Proc. R. Soc. B.* **278**, 2705–2713 (2011).
- 707 3. Braasch, I., Peterson, S. M., Desvignes, T., McCluskey, B. M., Batzel, P. &  
708 Postlethwait, J. H. A new model army: emerging fish models to study the  
709 genomics of vertebrate Evo-Devo. *J. Exp. Zool.* **324**, 316–341 (2014).
- 710 4. Shalem, O., Sanjana, N. E. & Zhang, F. High-throughput functional genomics  
711 using CRISPR-Cas9. *Nat. Rev. Genet.* **16**, 299–311 (2015).
- 712 5. Streebman, J. T., Peichel, C. L. & Parichy, D. M. Developmental genetics of  
713 adaptation in Fishes: the case for novelty. *Annu. Rev. Ecol. Evol. Syst.* **38**,  
714 655–681 (2007).
- 715 6. Hamilton, F. *An Account of the Fishes Found in the River Ganges and Its*  
716 *Branches*. Hurst, Robinson, and Co, Edinburgh (1822).
- 717 7. Howe, K., Clark, D. M., Torroja, C. F., Torrance, J., Berthelot, C., Muffato, M.,  
718 Collins, J. E., Humphray, S., McLaren, K., Matthews, L., McLaren, S., Sealy, I.,  
719 Caccamo, M., Churcher, C., Scott, C., Barrett, J. C., Koch, R., Rauch, G.-J.,  
720 White, S., Chow, W. *et al.* The zebrafish reference genome sequence and its  
721 relationship to the human genome. *Nature* **496**, 498–503 (2013).
- 722 8. Kettleborough, R. N. W., Busch-Nentwich, E. M., Harvey, S. A., Dooley, C. M.,  
723 de Bruijn, E., van Eeden, F., Sealy, I., White, R. J., Herd, C., Nijman, I. J.,  
724 Fényes, F., Mehroke, S., Scahill, C., Gibbons, R., Wali, N., Carruthers, S.,  
725 Hall, A., Yen, J., Cuppen, E. & Stemple, D. L. A systematic genome-wide  
726 analysis of zebrafish protein-coding gene function. *Nature* **496**, 494–497  
727 (2013).
- 728 9. McMennamin, S. K., Bain, E. J., McCann, A. E., Patterson, L. B., Eom, D. S.,  
729 Zachary P. Waller, Z. P., Hamill, J. C., Kuhlman, J. A., Eisen, J. S. & Parichy, D.  
730 M. Thyroid hormone-dependent adult pigment cell lineage and pattern in  
731 zebrafish. *Science* **345**, 1358–1361 (2014).
- 732 10. McCluskey, B. M. & Postlethwait, J. H. Phylogeny of zebrafish, a "model



- 733 species," within *Danio*, a 'model genus'. *Mol. Biol. Evol.* **32**, 635–652  
734 (2015).
- 735 11. Patterson, L. B., Bain, E. J. & Parichy, D. M. Pigment cell interactions and  
736 differential xanthophore recruitment underlying zebrafish stripe  
737 reiteration and *Danio* pattern evolution. *Nat. Commun.* **5**, 5299 (2014).
- 738 12. Parichy, D. M. The natural history of model organisms: advancing biology  
739 through a deeper understanding of zebrafish ecology and evolution. *eLife*  
740 **4**, e05635 (2015).
- 741 13. Rüber, L., Kottelat, M., Tan, H. H., Ng, P. K. L. & Britz, R. Evolution of  
742 miniaturization and the phylogenetic position of *Paedocypris*, comprising  
743 the world's smallest vertebrate. *BMC Evol. Biol.* **7**, 38 (2007).
- 744 14. Britz, R. & Conway, K. W. Osteology of *Paedocypris*, a miniature and highly  
745 developmentally truncated fish (Teleostei: Ostariophysi: Cyprinidae). *J.*  
746 *Morphol.* **270**, 389–412 (2009).
- 747 15. Britz, R., Conway, K. W. & Rüber, L. Miniatures, morphology and molecules:  
748 *Paedocypris* and its phylogenetic position (Teleostei, Cypriniformes). *Zool.*  
749 *J. Linnean Soc.* **172**, 556–615 (2014).
- 750 16. Britz, R. & Conway, K. W. *Danionella dracula*, an escape from the  
751 cypriniform Bauplan via developmental truncation? *J. Morphol.* **277**, 147–  
752 166 (2015).
- 753 17. Conway, K. W. & Britz, R. Sexual dimorphism of the Weberian apparatus  
754 and pectoral girdle in *Sundadanio axelrodi* (Ostariophysi: Cyprinidae). *J.*  
755 *Fish Biol.* **71**, 1562–1570 (2007).
- 756 18. Conway, K. W., Kubicek, K. M. & Britz, R. Morphological novelty and modest  
757 developmental truncation in *Barboides*, Africa's smallest vertebrates  
758 (Teleostei: Cyprinidae). *J. Morphol.* **14**, 33–18 (2017).
- 759 19. Fang, F., Nori n, M., Liao, T. Y., Källersjö, M. & Kullander, S. O. Molecular  
760 phylogenetic interrelationships of the south Asian cyprinid genera *Danio*,  
761 *Devario* and *Microrasbora* (Teleostei, Cyprinidae, Danioninae). *Zool.*  
762 *Scripta* **38**, 237–256 (2009).
- 763 20. Tang, K. L., Agnew, M. K., Vincent Hirt, M., Sado, T., Schneider, L. M.,  
764 Freyhof, J., Sulaiman, Z., Swartz, E., Vidthayanon, C., Miya, M., Saitoh, K.,  
765 Simons, A. M., Wood, R. M. & Mayden, R. L. Systematics of the subfamily  
766 *Danioninae* (Teleostei: Cypriniformes: Cyprinidae). *Mol. Phylogenet. Evol.*  
767 **57**, 189–214 (2010).
- 768 21. Stout, C. C., Tan, M., Lemmon, A. R., Lemmon, E. M. & Armbruster, J. W.  
769 Resolving Cypriniformes relationships using an anchored enrichment  
770 approach. *BMC Evol. Biol.* **16**, 244 (2016).
- 771 22. Arcila, D., Ortí, G., Vari, R., Armbruster, J. W., Stiassny, M. L. J., Ko, K. D.,  
772 Sabaj, M. H., Lundberg, J., Revell, L. J. & Betancur-R, R. Genome-wide  
773 interrogation advances resolution of recalcitrant groups in the tree of life.  
774 *Nat. Ecol. Evol.* **1**, 0020 (2017).
- 775 23. Hirt, M. V., Arratia, G., Chen, W. & Mayden, R. L. Effects of gene choice, base  
776 composition and rate heterogeneity on inference and estimates of  
777 divergence times in cypriniform fishes. *Biol. J. Linnean Soc.* (2017).  
778 [doi.org/10.1093/biolinnean/blw045](https://doi.org/10.1093/biolinnean/blw045)
- 779 24. Mayden, R. L. & Chen, W.-J. The world's smallest vertebrate species of the  
780 genus *Paedocypris*: a new family of freshwater fishes and the sister group  
781 to the world's most diverse clade of freshwater fishes (Teleostei:

- 782 Cypriniformes). *Mol. Phylogenet. Evol.* **57**, 152–175 (2010).
- 783 25. Kottelat, M., Britz, R., Hui, T. H. & Witte, K.-E. *Paedocypris*, a new genus of  
784 Southeast Asian cyprinid fish with a remarkable sexual dimorphism,  
785 comprises the world's smallest vertebrate. *Proc. Biol. Sci.* **273**, 895–899  
786 (2006).
- 787 26. Jaillon, O., Aury, J.-M., Brunet, F., Petit, J.-L., Stange-Thomann, N., Mauceli,  
788 E., Bouneau, L., Fischer, C., Ozouf-Costaz, C., Bernot, A., Nicaud, S., Jaffe, D.,  
789 Fisher, S., Lutfalla, G., Dossat, C., Segurens, B., Dasilva, C., Salanoubat, M.,  
790 Levy, M., Boudet, N. *et al.* Genome duplication in the teleost fish *Tetraodon*  
791 *nigroviridis* reveals the early vertebrate proto-karyotype. *Nature* **431**,  
792 946–957 (2004).
- 793 27. Mallo, M. & Alonso, C. R. The regulation of *Hox* gene expression during  
794 animal development. *Development* **140**, 3951–3963 (2013).
- 795 28. Gaunt, S. J. The significance of *Hox* gene collinearity. *Int. J. Dev. Biol.* **59**,  
796 159–170 (2015).
- 797 29. Henkel, C. V., Burgerhout, E., de Wijze, D. L., Dirks, R. P., Minegishi, Y.,  
798 Jansen, H. J., Spaink, H. P., Dufour, S., Weltzien, F.-A., Tsukamoto, K. & van  
799 den Thillart G. E. E. J. M. Primitive duplicate *Hox* clusters in the European  
800 Eel's genome. *PLoS ONE* **7**, e32231–9 (2012).
- 801 30. Pascual-Anaya, J., D'Aniello, S., Kuratani, S. & Garcia-Fernández, J.  
802 Evolution of *Hox* gene clusters in deuterostomes. *BMC Dev. Biol.* **13**, 26  
803 (2013).
- 804 31. Yang, J., Chen, X., Bai, J., Fang, D., Qiu, Y., Jiang, W., Yuan, H., Bian, C., Lu, J.,  
805 He, S., Pan, X., Zhang, Y., Wang, X., You, X., Wang, Y., Sun, Y., Mao, D., Liu, Y.,  
806 Fan, G., Zhang, H. *et al.* The *Sinocyclocheilus* cavefish genome provides  
807 insights into cave adaptation. *BMC Biol.* **14**, 1–13 (2016).
- 808 32. Cunningham, F., Amode, M. R., Barrell, D., Beal, K., Billis, K., Brent, S.,  
809 Carvalho-Silva, D., Clapham, P., Coates, G., Fitzgerald, S., Gil, L., Girón, C. G.,  
810 Gordon, L., Hourlier, T., Hunt, S. S., Janacek, S. H., Johnson, N., Juettemann,  
811 T., Kähäri, A. K., Keenan, S. *et al.* Ensembl 2015. *Nucleic Acids Res.* **43**,  
812 D662–669 (2015).
- 813 33. Emms, D. M. & Kelly, S. OrthoFinder: solving fundamental biases in whole  
814 genome comparisons dramatically improves orthogroup inference  
815 accuracy. *Genome Biol.* **16**, 157 (2015).
- 816 34. Kaessmann, H. Origins, evolution, and phenotypic impact of new genes.  
817 *Genome Res.* **20**, 1313–1326 (2010).
- 818 35. Peterson, T. & Müller, G. B. Phenotypic novelty in EvoDevo: the distinction  
819 between continuous and discontinuous variation and its importance in  
820 evolutionary theory. *Evol. Biol.* **43**, 314–335 (2016).
- 821 36. Gregory, T. R. Animal genome size database (Available at  
822 <http://genomesize.com>).
- 823 37. Neafsey, D. E. & Palumbi, S. R. Genome size evolution in pufferfish: a  
824 comparative analysis of diodontid and tetraodontid pufferfish genomes.  
825 *Genome Res.* **13**, 821–830 (2003).
- 826 38. Zhang, G., Li, C., Li, Q., Li, B., Larkin, D. M., Lee, C., Storz, J. F., Antunes, A.,  
827 Greenwold, M. J., Meredith, R. W., Ödeen, A., Cui, J., Zhou, Q., Xu, L., Pan, H.,  
828 Wang, Z., Jin, L., Zhang, P., Hu, H., Yang, W. *et al.* Comparative genomics  
829 reveals insights into avian genome evolution and adaptation. *Science* **346**,  
830 1311–1320 (2014).

- 831 39. Hughes, A. L. & Friedman, R. Genome size reduction in the chicken has  
832 involved massive loss of ancestral protein-coding genes. *Mol. Biol. Evol.* **25**,  
833 2681–2688 (2008).
- 834 40. Vinogradov, A. E. Evolution of genome size: multilevel selection, mutation  
835 bias or dynamical chaos? *Curr. Opin. Genet. Dev.* **14**, 620–626 (2004).
- 836 41. Moss, S. P., Joyce, D. A., Humphries, S., Tindall, K. J. & Lunt, D. H.  
837 Comparative analysis of teleost genome sequences reveals an ancient  
838 intron size expansion in the zebrafish lineage. *Genome Biol. Evol.* **3**, 1187–  
839 1196 (2011).
- 840 42. Petrov, D. A. Mutational equilibrium model of genome size evolution.  
841 *Theor. Pop. Biol.* **61**, 531–544 (2002).
- 842 43. Gregory, T. R. Insertion–deletion biases and the evolution of genome size.  
843 *Gene* **324**, 15–34 (2004).
- 844 44. Sun, C., Shepard, D. B. & Chong, R. A. LTR retrotransposons contribute to  
845 genomic gigantism in plethodontid salamanders. *Genome Biol.* **4**, 168–183  
846 (2012).
- 847 45. Chénais, B., Caruso, A., Hiard, S. & Casse, N. The impact of transposable  
848 elements on eukaryotic genomes: from genome size increase to genetic  
849 adaptation to stressful environments. *Gene* **509**, 7–15 (2012).
- 850 46. Chalopin, D., Naville, M., Plard, F., Galiana, D. & Volff, J. N. Comparative  
851 analysis of transposable elements highlights mobilome diversity and  
852 evolution in vertebrates. *Genome Biol. Evol.* **7**, 567–580 (2015).
- 853 47. Kapusta, A., Suh, A. & Feschotte, C. Dynamics of genome size evolution in  
854 birds and mammals. *Proc. Natl. Acad. Sci. USA* **114**, E1460–E1469 (2017).
- 855 48. Smith, A.F.A., Hubley R., & Green, P. RepeatModeler Open-1.0. (2015)  
856 (Available at <http://www.repeatmasker.org>)
- 857 49. Kimura, M. A simple method for estimating evolutionary rates of base  
858 substitutions through comparative studies of nucleotide sequences. *J. Mol.*  
859 *Evol.* **16**, 111–120 (1980).
- 860 50. Bouckaert, R., Heled, J., Kühnert, D., Vaughan, T., Wu, C.-H., Xie, D., Suchard,  
861 M. A., Rambaut, A. & Drummond, A. J. BEAST 2: A software platform for  
862 Bayesian evolutionary analysis. *PLoS Comput. Biol.* **10**, e1003537 (2014).
- 863 51. Aravin, A. A., Hannon, G. J. & Brennecke, J. The Piwi-piRNA pathway  
864 provides an adaptive defense in the transposon arms race. *Science* **318**,  
865 761–764 (2007).
- 866 52. Levin, H. L. & Moran, J. V. Dynamic interactions between transposable  
867 elements and their hosts. *Nat. Rev. Genet.* **12**, 615–627 (2011).
- 868 53. Yu, X., Zhou, T., Li, K., Li, Y. & Zhou, M. On the karyosystematics of cyprinid  
869 fishes and a summary of fish chromosome studies in China. *Genetica* **72**,  
870 225–235 (1987).
- 871 54. Liu, S., Hui, T. H., Tan, S. L. & Hong, Y. Chromosome evolution and genome  
872 miniaturization in minifish. *PLoS ONE* **7**, e37305 (2012).
- 873 55. Zhang, Q. & Edwards, S. V. The Evolution of intron size in amniotes: a role  
874 for powered flight? *Genome Biol. Evol.* **4**, 1033–1043 (2012).
- 875 56. Small, C. M., Bassham, S., Catchen, J., Amores, A., Fuiten, A. M., Brown, R. S.,  
876 Jones, A. G. & Cresko, W. A. The genome of the Gulf pipefish enables  
877 understanding of evolutionary innovations. *Genome Biol.* **17**, 258 (2016).
- 878 57. Amores, A., Suzuki, T., Yan, Y.-L., Pomeroy, J., Singer, A., Amemiya, C. &  
879 Postlethwait, J. H. Developmental roles of pufferfish *Hox* clusters and

- 880 genome evolution in ray-fin fish. *Genome Res.* **14**, 1–10 (2004).
- 881 58. Chen, F., Greer, J. & Capecchi, M. R. Analysis of *Hoxa7/Hoxb7* mutants  
882 suggests periodicity in the generation of the different sets of vertebrae.  
883 *Mech. Dev.* **77**, 49–57 (1998).
- 884 59. Nakamura, T., Gehrke, A. R., Lemberg, J., Szymaszek, J. & Shubin, N. H.  
885 Digits and fin rays share common developmental histories. *Nature* **537**,  
886 225–228 (2016).
- 887 60. Miller, J. R., Delcher, A. L., Koren, S., Venter, E., Walenz, B. P., Brownley, A.,  
888 Johnson, J., Li, K., Mobarry, C. & Sutton G. Aggressive assembly of  
889 pyrosequencing reads with mates. *Bioinformatics* **24**, 2818–2824 (2008).
- 890 61. Weisenfeld, N. I., Yin, S., Sharpe, T., Lau, B., Hegarty, R., Holmes, L., Sogoloff,  
891 B., Tabbaa, D., Williams, L., Russ, C., Nusbaum, C., Lander, E. S., MacCallum I.  
892 & Jaffe, D. B. Comprehensive variation discovery in single human genomes.  
893 *Nat. Genet.* **46**, 1350–1355 (2014).
- 894 62. Wences, A. H. & Schatz, M. C. Metassembler: merging and optimizing de  
895 novo genome assemblies. *Genome Biol.* **16**, 207 (2015).
- 896 63. Simão, F. A., Waterhouse, R. M., Ioannidis, P., Kriventseva, E. V. & Zdobnov,  
897 E. M. BUSCO: assessing genome assembly and annotation completeness  
898 with single-copy orthologs. *Bioinformatics* **31**, 3210–3212 (2015).
- 899 64. Vezzi, F., Narzisi, G. & Mishra, B. Reevaluating assembly evaluations with  
900 feature response curves: GAGE and assemblathons. *PLoS ONE* **7**, e52210  
901 (2012).
- 902 65. Cantarel, B. L., Korf, I., Robb, S. M. C., Parra, G., Ross, E., Moore, B., Holt, C.,  
903 Alvarado, A. S. & Yandell, M. MAKER: An easy-to-use annotation pipeline  
904 designed for emerging model organism genomes. *Genome Res.* **18**, 188–  
905 196 (2007).
- 906 66. Holt, C. & Yandell, M. MAKER2: An annotation pipeline and genome-  
907 database management tool for second-generation genome projects. *BMC*  
908 *Bioinform.* **12**, 491 (2011).
- 909 67. Campbell, M. S., Law, M. Y, Holt, C., Stein, J. C., Moghe, G. D., Hufnagel, D. E.,  
910 Lei, J., Achawanantakun, R., Jiao, D., Lawrence, C. J., Ware, D., Shiu, S.-H.,  
911 Childs, K. L., Sun, Y., Jiang, N. & Yandell, M. MAKER-P: A tool kit for the  
912 rapid creation, management, and quality control of plant genome  
913 annotations. *Plant Physiol.* **164**, 513–524 (2014).
- 914 68. Altschul, S. F., Gish, W., Miller, W., Myers, E. W. & Lipman, D. J. Basic local  
915 alignment search tool. *J. Mol. Biol.* **215**, 403–410 (1990).
- 916 69. Slater, G. & Birney, E. Automated generation of heuristics for biological  
917 sequence comparison. *BMC Bioinform.* **6**, 31 (2005).
- 918 70. Frazer, K. A., Pachter, L., Poliakov, A., Rubin, E. M. & Dubchak, I. VISTA:  
919 computational tools for comparative genomics. *Nucleic Acids Res.* **32**,  
920 W273–W279 (2004).
- 921 71. Li, H. & Durbin, R. Fast and accurate short read alignment with Burrows-  
922 Wheeler transformation. *Bioinformatics* **25**, 1754–1760 (2009).
- 923 72. Li, H., Handsaker, B., Wysoker, A., Fennell, T., Ruan, J., Homer, N., Marth, G.,  
924 Abecasis, G., Durbin, R. & 1000 Genome Project Data Processing Subgroup.  
925 The sequence alignment/map format and SAMtools. *Bioinformatics* **25**,  
926 2078–2079 (2009).
- 927 73. Li, H. A statistical framework for SNP calling, mutation discovery,  
928 association mapping and population genetical parameter estimation from

- 929 sequencing data. *Bioinformatics* **27**, 2987–2993 (2011).  
930 74. Malmstrøm, M., Matschiner, M., Tørresen, O. K., Star, B., Snipen, L. G.,  
931 Hansen, T. F., Baalsrud, H. T., Nederbragt, A. J., Hanel, R., Salzburger, W.,  
932 Stenseth, N. C., Jakobsen, K. S. & Jentoft, S. Evolution of the immune system  
933 influences speciation rates in teleost fishes. *Nat. Genet.* **48**, 1204–1210  
934 (2016).  
935 75. Malmstrøm, M., Matschiner, M., Tørresen, O. K., Jakobsen, K. S. & Jentoft, S.  
936 Whole genome sequencing data and de novo draft assemblies for 66  
937 teleost species. *Sci. Data* **4**, 160132–13 (2017).  
938 76. Katoh, K. & Standley, D. M. MAFFT multiple sequence alignment software  
939 version 7: improvements in performance and usability. *Mol. Biol. Evol.* **30**,  
940 772–780 (2013).  
941 77. Larsson, A. AliView: a fast and lightweight alignment viewer and editor for  
942 large datasets. *Bioinformatics* **30**, 3276–3278 (2014).  
943 78. Burge, C. & Karlin, S. Prediction of complete gene structures in human  
944 genomic DNA. *J. Mol. Biol.* **268**, 78–94 (1997).  
945 79. Wang, Y., Tang, H., DeBarry, J. D., Tan, X., Li, J., Wang, X., Lee, T.-H., Jin, H.,  
946 Marler, B., Guo, H., Kissinger, J. C. & Paterson, A. H. MCScanX: a toolkit for  
947 detection and evolutionary analysis of gene synteny and collinearity.  
948 *Nucleic Acids Res.* **40**, e49 (2012).  
949
